# Supplementary material
Source: PubMed Central journal article supplement (PMC10102256)

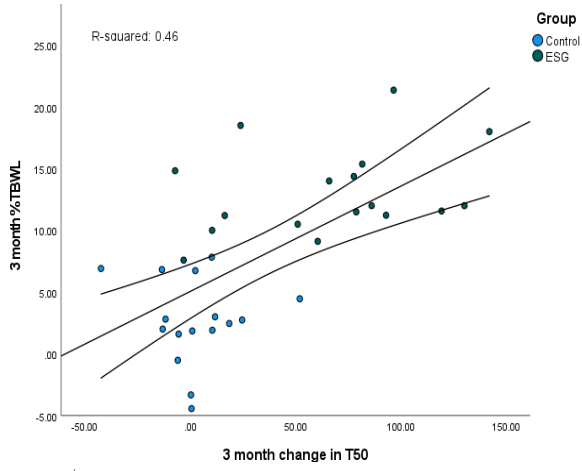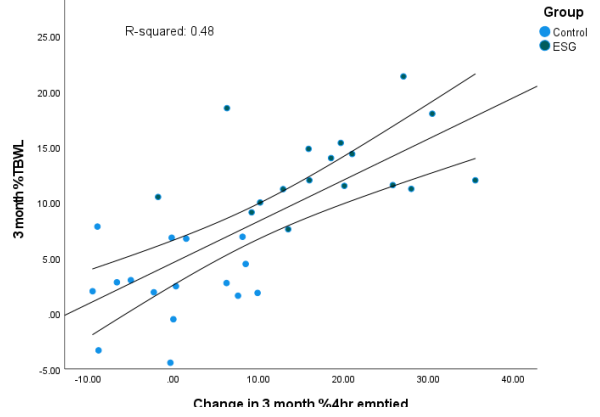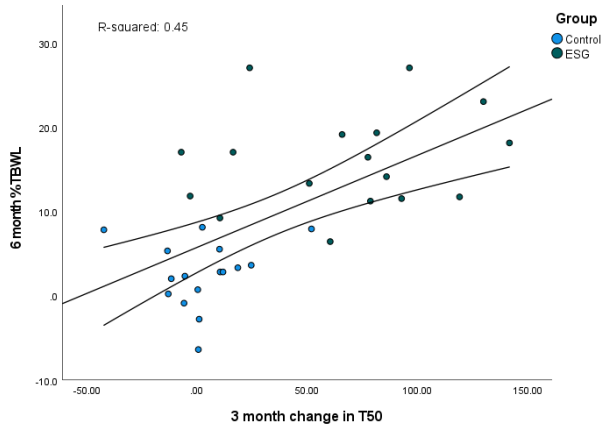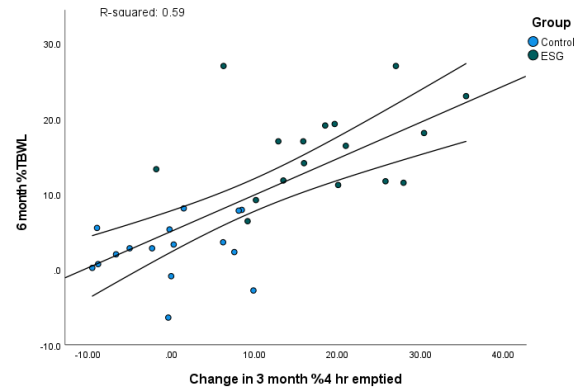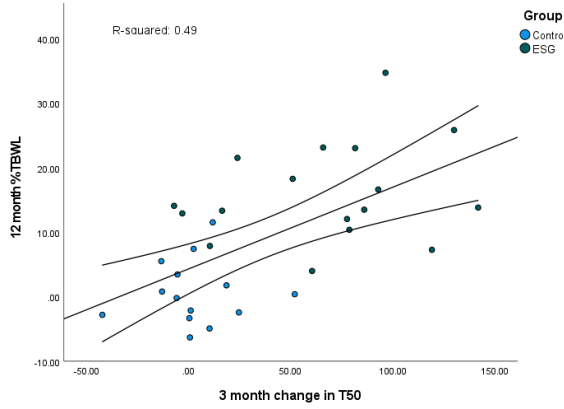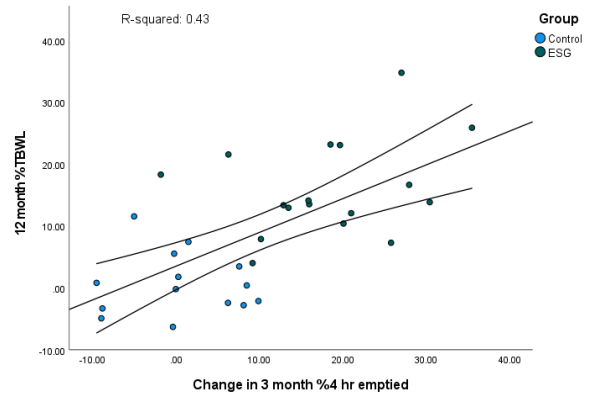

Supplement: NIHMS1877235-supplement-Supp5.pdf [file NIHMS1877235-supplement-Supp5.pdf]
